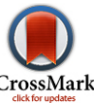

## Correction

# Correction: Epidemics in Partially Overlapped Multiplex Networks

## The PLOS ONE Staff

There are errors in two equations in the published article. In the Results section, Equation (2) is represented incorrectly. The correct equation, provided by the authors, can be viewed here:

$$J|_{f_A=f_B=0} = \begin{pmatrix} T(\kappa_A - 1) & T_q \langle \kappa_B \rangle \\ T_q \langle k_A \rangle & T(\kappa_B - 1) \end{pmatrix}$$

There is an error in the fourth sentence of the second paragraph of the Results section. The correct sentence should read: Figure 3 shows the results for (a) two ER layers with  $\langle k_A \rangle = 6$  and  $\langle k_B \rangle = 4$  and (b) two power law distributed layers with an exponential cutoff  $c = 20$ , where  $P(k) \sim k^{-\lambda} e^{-k/c}$ , and exponents  $\lambda_A = 2.5$  and  $\lambda_B = 3.5$ .

## Reference

1. Buono C, Alvarez-Zuzek LG, Macri PA, Braunstein LA (2014) Epidemics in Partially Overlapped Multiplex Networks. PLoS ONE 9(3): e92200. doi:10.1371/journal.pone.0092200

**Citation:** The PLOS ONE Staff (2014) Correction: Epidemics in Partially Overlapped Multiplex Networks. PLoS ONE 9(7): e104373. doi:10.1371/journal.pone.0104373

**Published:** July 29, 2014

**Copyright:** © 2014 The PLOS ONE Staff. This is an open-access article distributed under the terms of the Creative Commons Attribution License, which permits unrestricted use, distribution, and reproduction in any medium, provided the original author and source are credited.
